# Supplementary material for: Accelerated biological aging, inflammatory bowel disease, genetic susceptibility and life expectancy: Evidence from UK Biobank and All of Us Cohorts
Source: Research Square preprint supplement (doi:10.21203/rs.3.rs-5705746/v1), 2025-01-22

***Supplementary methods***

***Polygenic risk score (PRS) calculations***

The Polygenic Risk Score (PRS) for IBD is built on genotype data gathered by the UK Biobank's exclusively designed Axiom Genotyping Microarray. This chip can detect 825,927 genetic variants and interpolates genome-wide figures. The GWAS summary statistics of IBD was considered as discovery set for SNP selection and risk allele weighting (https://www.ebi.ac.uk/gwas/studies/GCST004131). The PRS algorithm uses a Bayesian approach, combining data from different ancestral contexts and related traits, to compute a PRS value for each individual by meta-analysing specific traits. This value is obtained by multiplying the posterior effect size of all genetic variants with the dose of the corresponding allele and summing. We adjusted for first six PCs, sex, age, BMI and genotyping platform.

***Figure Legends:***

***Supplementary Figure 1: Directed acyclic graph (DAG) for evaluation of covariates in the Cox proportional hazard analysis model in the UK Biobank.***

TDindex: Townsend deprivation index; VD: Vitamin D deficiency; BMI: body mass index;

IBD: Inflammatory bowel disease; UC: Ulcerative colitis; CD: Crohn´s disease

***Supplementary Figure 2: Association between life expectancy lost and biological aging(UC/CD) in the UK Biobank.***

1. Association between loss of life expectancy and KDMAgeAccel in the UK Biobank (UC; quartile analysis).
2. Association between loss of life expectancy and PhenoAgeAccel in the UK Biobank (UC; quartile analysis).
3. Association between loss of life expectancy and KDMAgeAccel in the UK Biobank (CD; quartile analysis).
4. Association between loss of life expectancy and PhenoAgeAccel in the UK Biobank (CD; quartile analysis).

*IBD: Inflammatory bowel disease; UC: Ulcerative colitis; CD: Crohn´s disease

*Q2:2nd quartile; Q3:3rd quartile; Q4:4th quartile;

***Supplementary Figure 3: Forest plot of subgroup interaction effects on KDMAgeAccel (IBD) in the UK Biobank.***

*HR: hazard ratios;95% CI:95% confidence interval; *Pi*: *P* -value for interaction;

BMI: body mass index; IBD: Inflammatory bowel disease

***Supplementary Figure 4: Forest plot of subgroup interaction effects on PhenoAgeAccel (IBD) in the UK Biobank.***

*HR: hazard ratios;95% CI:95% confidence interval; *Pi*: *P* -value for interaction;

BMI: body mass index; IBD: Inflammatory bowel disease

***Supplementary Figure 5: Forest plot of subgroup interaction effects on KDMAgeAccel (UC) in the UK Biobank.***

*HR: hazard ratios;95% CI:95% confidence interval; *Pi*: *P* -value for interaction;

BMI: body mass index; UC: Ulcerative colitis

***Supplementary Figure 6: Forest plot of subgroup interaction effects on PhenoAgeAccel (UC) in the UK Biobank.***

*HR: hazard ratios;95% CI:95% confidence interval; *Pi*: *P* -value for interaction;

BMI: body mass index; UC: Ulcerative colitis

***Supplementary Figure 7: Forest plot of subgroup interaction effects on KDMAgeAccel (CD) in the UK Biobank.***

*HR: hazard ratios;95% CI:95% confidence interval; *Pi*: *P* -value for interaction;

BMI: body mass index; CD: Crohn´s disease

***Supplementary Figure 8: Forest plot of subgroup interaction effects on PhenoAgeAccel (CD) in the UK Biobank.***

*HR: hazard ratios;95% CI:95% confidence interval; *Pi*: *P* -value for interaction;

BMI: body mass index; CD: Crohn´s disease

**Supplementary Figure 9: *Dose-response association between KDMAgeAccel/PhenoAgeAccel and IBD risk as assessed by restricted cubic spline regression in the UK Biobank.***

IBD: Inflammatory bowel disease

***Supplementary Table 1：Baseline characteristics of*** ***participants of PhenoAge in AoU.***

|  | ***Participants of PhenoAge in AoU*** | |
| --- | --- | --- |
|  | ***Non-IBD*** | ***IBD*** |
| No. of participants, n | 6,284 | 254 |
| Age (years), mean (SD) | 55.5 (14.5) | 50.4 (16.8) |
| **Sex, n (%)** |  |  |
| Female | 2,185 (34.8) | 97 (38.2) |
| Male | 3,571 (56.8) | 186 (73.2) |
| **Ethnicity, n (%)** |  |  |
| White | 2,185 (34.8) | 97 (38.2) |
| Black or African American | 3,571 (56.8) | 186 (73.2) |
| More than one population | 113 (1.8) | 8 (3.1) |
| Asian | 119 (1.9) | 4 (1.6) |
| Hispanic American | 1,286 (20.5) | 17 (6.7) |
| Other | 124 (2.0) | 2 (0.8) |
| **Education (%)** |  |  |
| High school degree | 1,775 (28.2) | 49 (19.3) |
| High school diploma or above | 4,509 (71.8) | 205 (80.7) |
| **Smoking status, n (%)** |  |  |
| Never | 4,256 (67.7) | 184 (72.4) |
| Some days | 657 (10.5) | 27 (10.6) |
| Every day | 1,371 (21.8) | 43 (16.9) |
| **Alcohol intake frequency, n (%)** |  |  |
| Never | 1,551 (24.7) | 64 (25.2) |
| Sometimes | 3,371 (53.6) | 132 (52.0) |
| Frequent | 1,362 (21.7) | 58 (22.8) |
| **Drugs** |  |  |
| Antibiotic, n (%) | 5,907 (94.0) | 242 (95.3) |
| Salicylic acid, n (%) | 3,743 (59.6) | 136 (53.5) |
| Insulin, n (%) | 1,677 (26.7) | 67 (26.4) |
| **Disease** |  |  |
| Depression, n (%) | 2,678 (42.6) | 126 (49.6) |
| Anxiety, n (%) | 3,080 (49.0) | 112 (44.1) |
| Biological age,non-accelerated aging , n (%) | 2,476 (39.4) | 81 (31.9) |
| Biological age, accelerated aging , n (%) | 3,808 (60.6) | 173 (68.1) |

***Supplementary Table 2：Association between accelerated biological aging and risk of Crohn's disease (CD) in the UK Biobank.***

|  | **Model 1** | | **Model 2** | | **Model 3** | |
| --- | --- | --- | --- | --- | --- | --- |
|  | **HR (95% CI)** | ***P*-value** | **HR (95% CI)** | ***P*-value** | **HR (95% CI)** | ***P*-value** |
| **KDMAgeAccel** | | | | | | |
| **Continuous** | 1.09(1.04-1.14) | <0.001 | 1.07(1.03-1.12) | 0.001 | 1.07(1.03-1.12) | 0.001 |
| **Quartile 1** | 1 (ref) | .. | 1 (ref) | .. | 1 (ref) | .. |
| **Quartile 2** | 0.78(0.64-0.95) | 0.015 | 0.79(0.65-0.96) | 0.019 | 0.79(0.65-0.96) | 0.017 |
| **Quartile 3** | 1.06(0.88-1.28) | 0.550 | 1.05(0.87-1.26) | 0.621 | 1.05(0.87-1.26) | 0.613 |
| **Quartile 4** | 1.33(1.12-1.57) | <0.001 | 1.25(1.06-1.48) | 0.009 | 1.25(1.06-1.49) | 0.007 |
| **Non-accelerated aging** | 1 (ref) | .. | 1 (ref) | .. | 1 (ref) | .. |
| **Accelerated aging** | 1.35(1.19-1.52) | <0.001 | 1.29(1.15-1.46) | <0.001 | 1.30(1.15-1.47) | <0.001 |
| **PhenoAgeAccel** | | | | | | |
| **Continuous** | 1.09(1.08-1.11) | <0.001 | 1.08(1.07-1.10) | <0.001 | 1.08(1.07-1.10) | <0.001 |
| **Quartile 1** | 1 (ref) | .. | 1 (ref) | .. | 1 (ref) | .. |
| **Quartile 2** | 1.32(1.10-1.59) | 0.003 | 1.31(1.09-1.57) | 0.004 | 1.31(1.09-1.57) | 0.004 |
| **Quartile 3** | 1.54(1.28-1.84) | <0.001 | 1.50(1.25-1.79) | <0.001 | 1.50(1.26-1.80) | <0.001 |
| **Quartile 4** | 2.72(2.30-3.22) | <0.001 | 2.47(2.09-2.92) | <0.001 | 2.47(2.09-2.92) | <0.001 |
| **Non-accelerated aging** | 1 (ref) | .. | 1 (ref) | .. | 1 (ref) | .. |
| **Accelerated aging** | 2.10(1.87-2.35) | <0.001 | 1.92(1.71-2.16) | <0.001 | 1.93(1.72-2.17) | <0.001 |

1: Model 1 was adjusted for age, sex, Ethnicity, Townsend Deprivation Index(TDI), education, smoking, alcohol, BMI, vegetable, fruit, environment, exercise

2: Model 2 was adjusted for age, sex, Ethnicity, Townsend Deprivation Index(TDI), education, smoking, alcohol, BMI, vegetable, fruit, environment, exercise, history of antibiotic, history of salicylic acid, history of corticosteroid, history of immunoregulation

3: Model 3 was adjusted for age, sex, Ethnicity, Townsend Deprivation Index(TDI), education, smoking, alcohol, BMI, vegetable, fruit, environment, exercise, history of antibiotic, history of salicylic acid, history of corticosteroid, history of immunoregulation, history of cardiopathy, history of cancer, history of depression, history of anxiety, history of vitamin D deciency, history of appendectomy, genetic risk score for inflammatory bowel disease.

*BMI: body mass index

***Supplementary Table 3：******Association between accelerated biological aging and risk of Ulcerative Colitis(UC) in the UK Biobank.***

|  | Model 1 | | Model 2 | | Model 3 | |
| --- | --- | --- | --- | --- | --- | --- |
|  | **HR (95% CI)** | ***P*-value** | **HR (95% CI)** | ***P*-value** | **HR (95% CI)** | ***P*-value** |
| **KDMAgeAccel** | | | | | | |
| **Continuous** | 1.06 (1.03-1.10) | <0.001 | 1.05 (1.01-1.08) | 0.005 | 1.05 (1.01-1.08) | 0.005 |
| **Quartile 1** | 1 (ref) | .. | 1 (ref) | .. | 1 (ref) | .. |
| **Quartile 2** | 0.93 (0.81-1,07) | 0.305 | 0.93 (0.81-1.08) | 0.340 | 0.93 (0.81-1.08) | 0.350 |
| **Quartile 3** | 1.14 (1.00-1.31) | 0.550 | 1.14 (0.99-1.30) | 0.070 | 1.14 (0.99-1.30) | 0.070 |
| **Quartile 4** | 1.25 (1.10-1.42) | <0.001 | 1.19 (1.04-1.35) | 0.009 | 1.19 (1.04-1.35) | 0.009 |
| **Non-accelerated aging** | 1 (ref) | .. | 1 (ref) | .. | 1 (ref) | .. |
| **Accelerated aging** | 1.23 (1.13-1.35) | <0.001 | 1.20 (1.09-1.31) | <0.001 | 1.19 (1.09-1.31) | <0.001 |
| **PhenoAgeAccel** | | | | | | |
| **Continuous** | 1.06 (1.05-1.07) | <0.001 | 1.05 (1.04-1.06) | <0.001 | 1.05 (1.04-1.06) | <0.001 |
| **Quartile 1** | 1 (ref) | .. | 1 (ref) | .. | 1 (ref) | .. |
| **Quartile 2** | 1.28 (1.13-1.45) | <0.001 | 1.26 (1.11-1.44) | <0.001 | 1.26 (1.11-1.44) | <0.001 |
| **Quartile 3** | 1.50 (1.32-1.70) | <0.001 | 1.46 (1.29-1.66) | <0.001 | 1.46 (1.29-1.65) | <0.001 |
| **Quartile 4** | 2.09 (1.85-2.35) | <0.001 | 1.91 (1.69-2.15) | <0.001 | 1.89 (1.68-2.14) | <0.001 |
| **Non-accelerated aging** | 1 (ref) | .. | 1 (ref) | .. | 1 (ref) | .. |
| **Accelerated aging** | 1.63 (1.50-1.78) | <0.001 | 1.51 (1.38-1.64) | <0.001 | 1.50 (1.37-1.63) | <0.001 |

1: Model 1 was adjusted for age, sex, Ethnicity, Townsend Deprivation Index(TDI), education, smoking, alcohol, BMI, vegetable, fruit, environment, exercise

2: Model 2 was adjusted for age, sex, Ethnicity, Townsend Deprivation Index(TDI), education, smoking, alcohol, BMI, vegetable, fruit, environment, exercise, history of antibiotic, history of salicylic acid, history of corticosteroid, history of immunoregulation

3: Model 3 was adjusted for age, sex, Ethnicity, Townsend Deprivation Index(TDI), education, smoking, alcohol, BMI, vegetable, fruit, environment, exercise, history of antibiotic, history of salicylic acid, history of corticosteroid, history of immunoregulation, history of cardiopathy, history of cancer, history of depression, history of anxiety, history of vitamin D deciency, history of appendectomy, genetic risk score for inflammatory bowel disease.

*****BMI: body mass index

***Supplementary Table 4 : Association between PhenoAgeAccel and risk of IBD in AoU.***

|  | **Model 1** | | **Model 2** | | **Model 3** | |
| --- | --- | --- | --- | --- | --- | --- |
|  | **HR (95% CI)** | ***P*-value** | **HR (95% CI)** | ***P*-value** | **HR (95% CI)** | ***P*-value** |
| **Quartile 1** | 1 (ref) | .. | 1 (ref) | .. | 1 (ref) | .. |
| **Quartile 2** | 1.82 (1.23-2.68) | 0.002 | 1.84 (1.25-2.71) | 0.002 | 1.86 (1.26-2.75) | <0.001 |
| **Quartile 3** | 1.63 (1.09-2.46) | 0.018 | 1.66 (1.10-2.50) | 0.016 | 1.67 (1.11-2.52) | 0.015 |
| **Quartile 4** | 2.68 (1.81-3.98) | <0.001 | 2.81 (1.88-4.19) | <0.001 | 2.90 (1.93-4.34) | <0.001 |
| **Non-accelerated aging** | 1 (ref) | .. | 1 (ref) | .. | 1 (ref) | .. |
| **Accelerated aging** | 1.54 (1.17-2.04) | 0.002 | 1.55 (1.17-2.06) | 0.002 | 1.57 (1.18-2.09) | 0.002 |

**IBD:* inflammatory bowel disease

* Adjusted for sex, race, education, smoking, Alcohol, BMI, frequency emotional, anxiety, antibacterial, salicylic acid, vitamin D deficiency, self reported overall health status, depression, degree of movement that can be performed.

***Supplementary Table 5 : Association between PhenoAgeAccel and risk of CD in AoU.***

|  | **Model 1** | | **Model 2** | | **Model 3** | |
| --- | --- | --- | --- | --- | --- | --- |
|  | **HR (95% CI)** | ***P*-value** | **HR (95% CI)** | ***P*-value** | **HR (95% CI）** | ***P*-value** |
| **Quartile 1** | 1 (ref) | .. | 1 (ref) | .. | 1 (ref) | .. |
| **Quartile 2** | 2.47 (1.45-4.22) | <0.001 | 2.49 (1.46-4.25) | <0.001 | 2.53 (1.48-4.33) | <0.001 |
| **Quartile 3** | 2.09 (1.18-3.68) | 0.011 | 2.11 (1.20-3.73) | 0.010 | 2.16 (1.22-3.81) | 0.008 |
| **Quartile 4** | 4.21 (2.46-7.19) | <0.001 | 4.27 (2.48-7.35) | <0.001 | 4.52 (2.61-7.82) | <0.001 |
| **Non-accelerated aging** | 1 (ref) | .. | 1 (ref) | .. | 1 (ref) | .. |
| **Accelerated aging** | 1.80 (1.25-2.57) | 0.002 | 1.78 (1.24-2.56) | 0.002 | 1.82(1.26-2.63) | 0.001 |

********CD:* Crohn's disease

******* Adjusted for sex, race, education, smoking, Alcohol, BMI, frequency emotional, anxiety, antibacterial, salicylic acid, vitamin D deficiency, self reported overall health status, depression, degree of movement that can be performed.

***Supplementary Table 6 :* Association between PhenoAgeAccel and risk of UC in AoU.**

|  | **Model 1** | | **Model 2** | | **Model 3** | |
| --- | --- | --- | --- | --- | --- | --- |
|  | **HR (95% CI)** | ***P*-value** | **HR (95% CI)** | ***P*-value** | **HR (95% CI)** | ***P*-value** |
| **Quartile 1** | 1 (ref) | .. | 1 (ref) | .. | 1 (ref) | .. |
| **Quartile 2** | 1.49 (0.94-2.36) | 0.010 | 1.50 (0.95-2.38) | 0.081 | 1.53 (0.97-2.42) | 0.070 |
| **Quartile 3** | 1.30 (0.80-2.12) | 0.242 | 1.30 (0.79-2.12) | 0.298 | 1.29 (0.79-2.11) | 0.315 |
| **Quartile 4** | 2.12 (1.32-3.40) | 0.002 | 2.23 (1.38-3.60) | 0.001 | 2.22 (1.37-3.59) | 0.001 |
| **Non-accelerated aging** | 1 (ref) | .. | 1 (ref) | .. | 1 (ref) | .. |
| **Accelerated aging** | 1.28 (0.92-1.80) | 0.146 | 1.30 (0.92-1.82) | 0.131 | 1.29 (0.92-1.81) | 0.145 |

******* UC：Ulcerative Colitis

******* Adjusted for sex, race, education, smoking, alcohol, BMI, frequency emotional, anxiety, antibacterial, salicylic acid, vitamin D deficiency, self reported overall health status, depression, degree of movement that can be performed.

***Supplementary Table 7 : Association between KDMAgeAccel and the dynamic transitions of IBD(CD/UC) and death.***

|  | **Baseline-IBD** | | **Baseline-death** | | **IBD-death** | |
| --- | --- | --- | --- | --- | --- | --- |
|  | **HR (95% CI)** | ***P*-value** | **HR(95%CI)** | ***P*-value** | **HR (95% CI)** | ***P*-value** |
| **Continuous** | 1.05(1.03-1.08) | <0.001 | 1.13(1.12-1.15) | <0.001 | 1.10(1.00-1.20) | 0.045 |
| **Quartile 1** | 1 (ref) | .. | 1 (ref) | .. | 1 (ref) | .. |
| **Quartile 2** | 0.91(0.81-1.03) | 0.129 | 0.90(0.86-0.94) | <0.001 | 1.21(0.80-1.84) | 0.366 |
| **Quartile 3** | 1.27(1.05-1.53) | 0.067 | 1.11(1.07-1.16) | <0.001 | 1.50(1.01-2.23) | 0.044 |
| **Quartile 4** | 1.21(1.09-1.36) | <0.001 | 1.59(1.53-1.65) | <0.001 | 1.52(1.05-2.20) | 0.027 |
| **Non-accelerated aging** | 1 (ref) | .. | 1 (ref) | .. | 1 (ref) | .. |
| **Accelerated aging** | 1.22(1.13-1.32) | <0.001 | 1.40(1.36-1.43) | <0.001 | 1.21(0.96-1.53) | 0.102 |
|  | **Baseline-CD** | | **Baseline-death** | | **CD-death** | |
| **Continuous** | 1.07(1.03-1.12) | 0.001 | 1.14(1.12-1.15) | <0.001 | 1.04(0.91-1.19) | 0.544 |
| **Quartile 1** | 1 (ref) | .. | 1 (ref) | .. | 1 (ref) | .. |
| **Quartile 2** | 0.79(0.65-0.96) | 0.017 | 0.90(0.87-0.94) | <0.001 | 0.69(0.35-1.35) | 0.280 |
| **Quartile 3** | 1.05(0.87-1.26) | 0.613 | 1.12(1.07-1.16) | <0.001 | 1.18(0.66-2.12) | 0.571 |
| **Quartile 4** | 1.25(1.06-1.49) | 0.007 | 1.59(1.53-1.65) | <0.001 | 1.23(0.72-2.13) | 0.447 |
| **Non-accelerated aging** | 1 (ref) | .. | 1 (ref) | .. | 1 (ref) | .. |
| **Accelerated aging** | 1.30(1.15-1.47) | <0.001 | 1.39(1.36-1.43) | <0.001 | 1.52(1.04-2.22) | 0.032 |
|  | **Baseline-UC** | | **Baseline-death** | | **UC-death** | |
| **Continuous** | 1.05(1.01-1.08) | 0.005 | 1.13(1.12-1.15) | <0.001 | 1.17(1.04-1.31) | 0.007 |
| **Quartile 1** | 1 (ref) | .. | 1 (ref) | .. | 1 (ref) | .. |
| **Quartile 2** | 0.93(0.81-1.08) | 0.350 | 0.90(0.86-0.94) | <0.001 | 1.67(0.98-2.85) | 0.060 |
| **Quartile 3** | 1.14(0.99-1.30) | 0.070 | 1.11(1.07-1.16) | <0.001 | 2.06(1.24-3.42) | 0.005 |
| **Quartile 4** | 1.19(1.04-1.35) | 0.009 | 1.58(1.53-1.65) | <0.001 | 2.10(1.30-3.39) | 0.003 |
| **Non-accelerated aging** | 1 (ref) | .. | 1 (ref) | .. | 1 (ref) | .. |
| **Accelerated aging** | 1.19(1.09-1.31) | <0.001 | 1.40(1.36-1.43) | <0.001 | 1.24(0.94-1.63) | 0.129 |

* IBD: Inflammatory bowel disease; UC: Ulcerative colitis; CD: Crohn´s disease

******* Adjusted for age, sex, Ethnicity, Townsend Deprivation Index(TDI), education, smoking, alcohol, BMI, vegetable, fruit, environment, exercise, history of antibiotic, history of salicylic acid, history of corticosteroid, history of immunoregulation, history of cardiopathy, history of cancer, history of depression, history of anxiety, history of vitamin D deciency, history of appendectomy, genetic risk score for inflammatory bowel disease.

***Supplementary Table 8 : Association between PhenoAgeAceel and the dynamic transitions of IBD(CD/UC) and death.***

|  | **Baseline-IBD** | | **Baseline-death** | | **IBD-death** | |
| --- | --- | --- | --- | --- | --- | --- |
|  | **HR (95% CI)** | ***P*-value** | **HR (95% CI)** | ***P*-value** | **HR (95% CI)** | ***P*-value** |
| **PhenoAgeAccel** | | | | | | |
| **Continuous** | 1.06(1.05-1.07) | <0.001 | 1.06(1.06-1.06) | <0.001 | 1.06(1.04-1.08) | <0.001 |
| **Quartile 1** | 1 (ref) | .. | 1 (ref) | .. | 1 (ref) | .. |
| **Quartile 2** | 1.25(1.12-1.40) | <0.001 | 1.11(1.07-1.15) | <0.001 | 1.12(0.75-1.67) | 0.586 |
| **Quartile 3** | 1.42(1.28-1.58) | <0.001 | 1.23(1.19-1.28) | <0.001 | 1.59(1.10-2.31) | 0.015 |
| **Quartile 4** | 1.96(1.76-2.17) | <0.001 | 1.80(1.75-1.87) | <0.001 | 1.86(1.31-2.65) | <0.001 |
| **Non-accelerated aging** | 1 (ref) | .. | 1 (ref) | .. | 1 (ref) | .. |
| **Accelerated aging** | 1.57(1.46-1.69) | <0.001 | 1.60(1.57-1.64) | <0.001 | 1.44(1.17-1.77) | <0.001 |
|  | **Baseline-CD** | | **Baseline-death** | | **CD-death** | |
| **Continuous** | 1.08(1.07-1.10) | <0.001 | 1.06 (1.06-1.06) | <0.001 | 1.06(1.02-1.09) | <0.001 |
| **Quartile 1** | 1 (ref) | .. | 1 (ref) | .. | 1 (ref) | .. |
| **Quartile 2** | 1.31(1.09-1.57) | 0.004 | 1.11(1.07-1.15) | <0.001 | 2.19(1.13-4.22) | 0.020 |
| **Quartile 3** | 1.50(1.26-1.80) | <0.001 | 1.24(1.19-1.28) | <0.001 | 1.97(1.02-3.79) | 0.043 |
| **Quartile 4** | 2.47(2.09-2.92) | <0.001 | 1.81(1.75-1.87) | <0.001 | 2.29(1.25-4.19) | 0.007 |
| **Non-accelerated aging** | 1 (ref) | .. | 1 (ref) | .. | 1 (ref) | .. |
| **Accelerated aging** | 1.93(1.72-2.17) | <0.001 | 1.61(1.57-1.65) | <0.001 | 1.28(0.93-1.76) | 0.135 |
|  | **Baseline-UC** | | **Baseline-death** | | **UC-death** | |
| **Continuous** | 1.05(1.04-1.06) | <0.001 | 1.06(1.06-1.06) | <0.001 | 1.07(1.04-1.09) | <0.001 |
| **Quartile 1** | 1 (ref) | .. | 1 (ref) | .. | 1 (ref) | .. |
| **Quartile 2** | 1.26(1.11-1.44) | <0.001 | 1.11 (1.07-1.15) | <0.001 | 0.84(0.51-1.35) | 0.465 |
| **Quartile 3** | 1.46(1.29-1.65) | <0.001 | 1.23(1.19-1.28) | <0.001 | 1.42(0.93-2.20) | 0.104 |
| **Quartile 4** | 1.89(1.68-2.14) | <0.001 | 1.81(1.75-1.87) | <0.001 | 1.79(1.19-2.69) | 0.005 |
| **Non-accelerated aging** | 1 (ref) | .. | 1 (ref) | .. | 1 (ref) | .. |
| **Accelerated aging** | 1.50(1.37-1.63) | <0.001 | 1.61(1.57-1.64) | <0.001 | 1.60(1.25-2.04) | <0.001 |

* IBD: Inflammatory bowel disease; UC: Ulcerative colitis; CD: Crohn´s disease

******* Adjusted for age, sex, Ethnicity, Townsend Deprivation Index(TDI), education, smoking, alcohol, BMI, vegetable, fruit, environment, exercise, history of antibiotic, history of salicylic acid, history of corticosteroid, history of immunoregulation, history of cardiopathy, history of cancer, history of depression, history of anxiety, history of vitamin D deciency, history of appendectomy, genetic risk score for inflammatory bowel disease.

***Supplementary Table 9：Association between dietary habits and medications and IBD risk.***

|  | **Hazard ratio (95% CI)** | ***P-* value** |
| --- | --- | --- |
| **KDMAgeAccel** | | |
| Antibiotic | 1.69 (1.30-2.19) | <0.001 |
| Salicylic acid | 1.20 (1.11-1.30) | <0.001 |
| Corticosteroid | 3.69 (3.03-4.49) | <0.001 |
| Immunoregulation | 5.27 (4.37-6.36) | <0.001 |
| Dried fruit | 0.96 (0.93-0.98) | <0.001 |
| Cooked vegetable | 0.97 (0.95-0.99) | 0.008 |
| **PhenoAgeAccel** | | |
| Antibiotic | 1.68 (1.33-2.11) | <0.001 |
| Salicylic acid | 1.20 (1.11-1.28) | <0.001 |
| Corticosteroid | 3.15 (2.61-3.81) | <0.001 |
| Immunoregulation | 4.62 (3.83-5.57) | <0.001 |
| Dried fruit | 0.95 (0.93-0.98) | <0.001 |
| Cooked vegetable | 0.97 (0.95-0.99) | 0.006 |

† Adjusted for chronological age, sex, ethnicity, education smoking, and alcohol intake.

***Supplementary Table 10：Association between dietary habits and medications and* KDMAgeAccel/PhenoAgeAccel*.***

|  | **Hazard ratio (95%CI)** | ***P-*value** |
| --- | --- | --- |
| **KDMAgeAccel** | | |
| Antibiotic | 1.83 (1.37-2.44) | <0.001 |
| Salicylic acid | 1.19 (1.09-1.30) | <0.001 |
| Corticosteroid | 3.57 (2.84-4.49) | <0.001 |
| Immunoregulation | 5.31 (4.29-6.57) | <0.001 |
| Dried fruit | 0.97 (0.95-1.00) | 0.098 |
| Cooked vegetable | 0.96 (0.94-0.99) | 0.014 |
| **PhenoAgeAccel** | | |
| Antibiotic | 1.57 (1.21-2.04) | <0.001 |
| Salicylic acid | 1.16 (1.07-1.26) | <0.001 |
| Corticosteroid | 2.57 (2.06-3.20) | <0.001 |
| Immunoregulation | 3.61 (2.91-4.48) | <0.001 |
| Dried fruit | 0.97 (0.95-1.00) | 0.094 |
| Cooked vegetable | 0.97 (0.95-0.99) | 0.026 |

† Adjusted for chronological age, sex, ethnicity, education smoking, and alcohol intake.

***Supplementary Table 11：Mediating effects of biological aging acceleration on the association between dietary habits, medications and IBD.***

|  | **β (95%CI)** | ***P* value** |
| --- | --- | --- |
| **KDMAgeAccel** | | |
| Antibiotic | 0.11 (0.07-0.16) | <0.001 |
| Salicylic acid | 0.19 (0.18- 0.20) | <0.001 |
| Corticosteroid | 0.44 (0.39-0.49) | <0.001 |
| Immunoregulation | 0.41 (0.36-0.47) | <0.001 |
| Dried fruit | -0.05 (-0.05--0.04) | <0.001 |
| Cooked vegetable | -0.01 (-0.02--0.01) | <0.001 |
| **PhenoAgeAccel** | | |
| Antibiotic | 1.00 (0.89-1.12) | <0.001 |
| Salicylic acid | 0.73 (0.70- 0.76) | <0.001 |
| Corticosteroid | 3.39 (3.26- 3.52) | <0.001 |
| Immunoregulation | 4.96 (4.80- 5.11) | <0.001 |
| Dried fruit | -0.14 (-0.14--0.13) | <0.001 |
| Cooked vegetable | -0.08 (-0.08--0.07) | <0.001 |

† Adjusted for chronological age, sex, ethnicity, education smoking, and alcohol intake.

***Supplementary Table 12：Mediating proportions of biological aging acceleration on the association between dietary habits, medications and IBD.***

|  | **Mediation proportion % (95% CI) #** | ***P-*value** |
| --- | --- | --- |
| **KDMAgeAccel** | | |
| Antibiotic | 1.3 (0.8-2.2) | <0.001 |
| Salicylic acid | 6.4 (4.7-9.8) | <0.001 |
| Corticosteroid | 2.4 (1.7-3.5) | <0.001 |
| Immunoregulation | 1.9 (1.3-3.0) | <0.001 |
| Dried fruit | 8.1 (5.3-24.2) | <0.001 |
| Cooked vegetable | 2.2 (1.3-4.1) | <0.001 |
| **PhenoAgeAccel** | | |
| Antibiotic | 13.8 (10.5-18.9) | <0.001 |
| Salicylic acid | 25.8 (19.2-34.1) | <0.001 |
| Corticosteroid | 20.0 (17.8-22.7) | <0.001 |
| Immunoregulation | 20.7 (19.0-23.0) | <0.001 |
| Dried fruit | 22.1 (18.0-54.2) | <0.001 |
| Cooked vegetable | 13.0 (10.7-23.6) | <0.001 |

95% confidence intervals were generated from 1000 bootstrap samples: adjusting for chronological age, sex, ethnicity, education and alcohol intake.**#**

***Supplementary Table 13：Association of biological aging acceleration with risk of occurrence of IBD after exclusion of individuals diagnosed with IBD within 2 years of baseline.***

|  | **KDMAgeAccel** | | **PhenoAgeAccel** | |
| --- | --- | --- | --- | --- |
| **HR（95% CI）** | ***P*-value** | **HR（95% CI）** | ***P*-value** |
| **IBD** | 1.19(1.09-1.29) | <0.001 | 1.48(1.36-1.64) | <0.001 |
| **UC** | 1.31(1.15-1.49) | <0.001 | 1.83(1.61-2.08) | <0.001 |
| **CD** | 1.15(1.04-1.26) | 0.008 | 1.42(1.29-1.56) | <0.001 |

*IBD: Inflammatory bowel disease; UC: Ulcerative colitis; CD: Crohn´s disease

***Supplementary Figure 1: Directed acyclic graph (DAG) for evaluation of covariates in the Cox proportional hazard analysis model in the UK Biobank.***


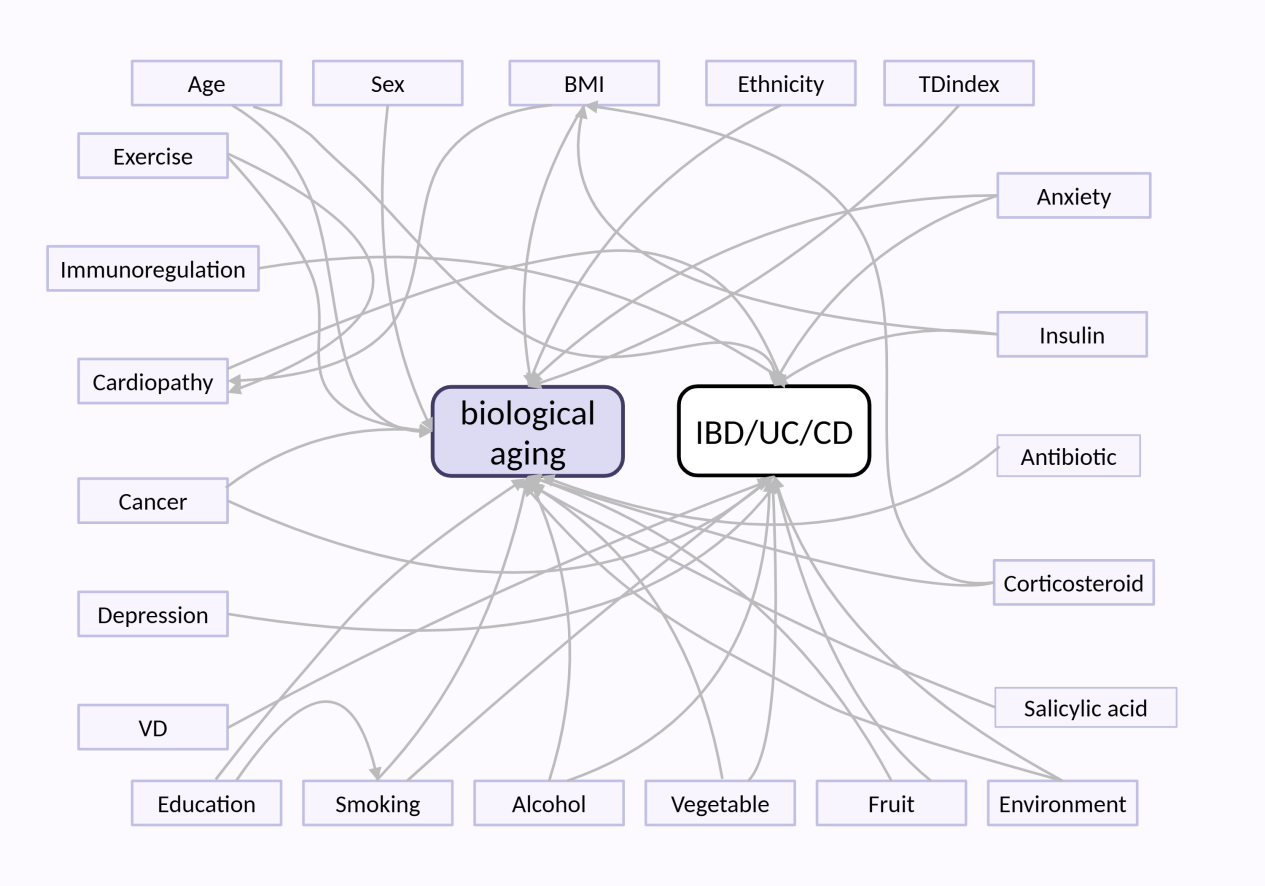


***Supplementary Figure 2: Association between life expectancy lost and biological aging (UC/CD)***


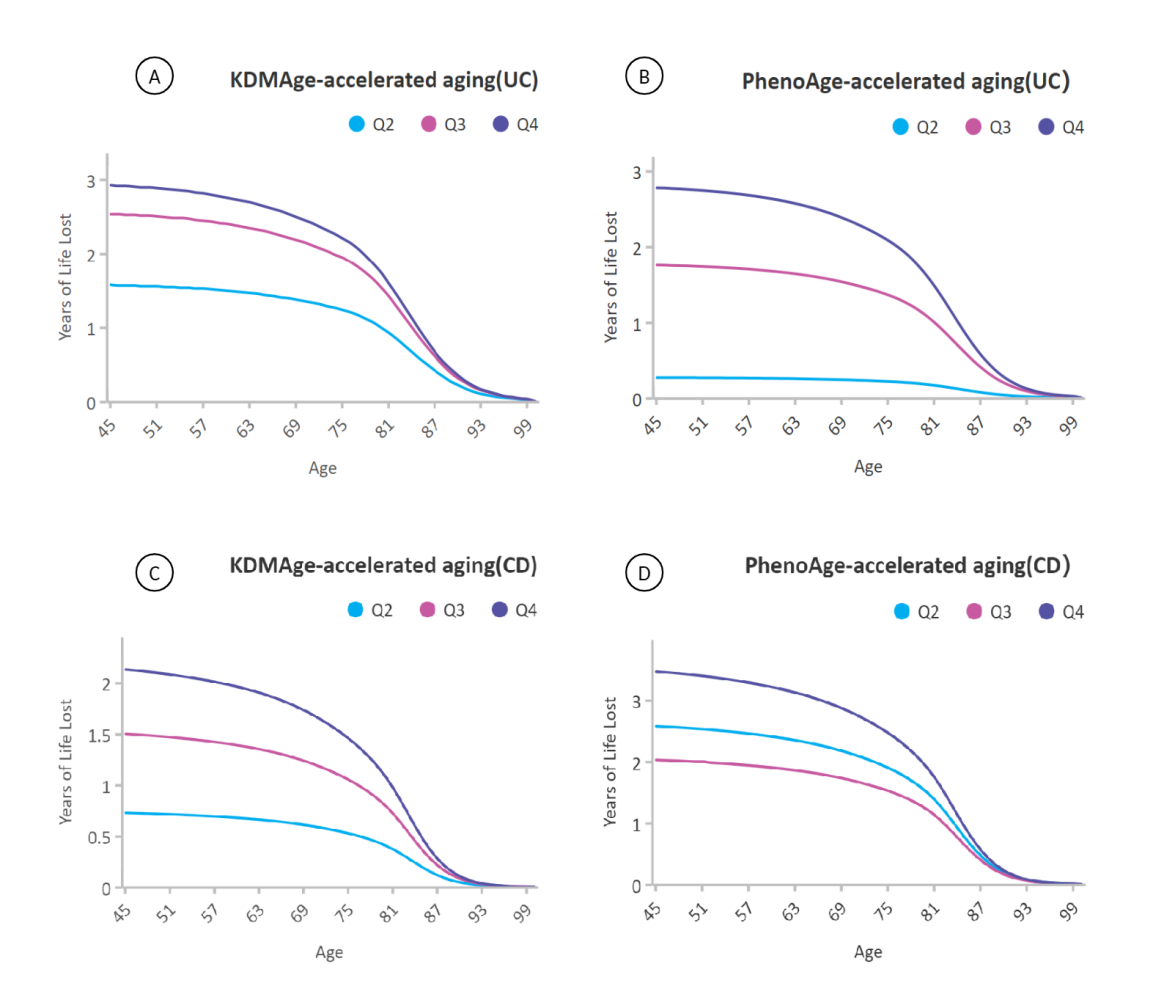


***Supplementary Figure 3: Forest plot of subgroup interaction effects on KDMAgeAccel (IBD).***


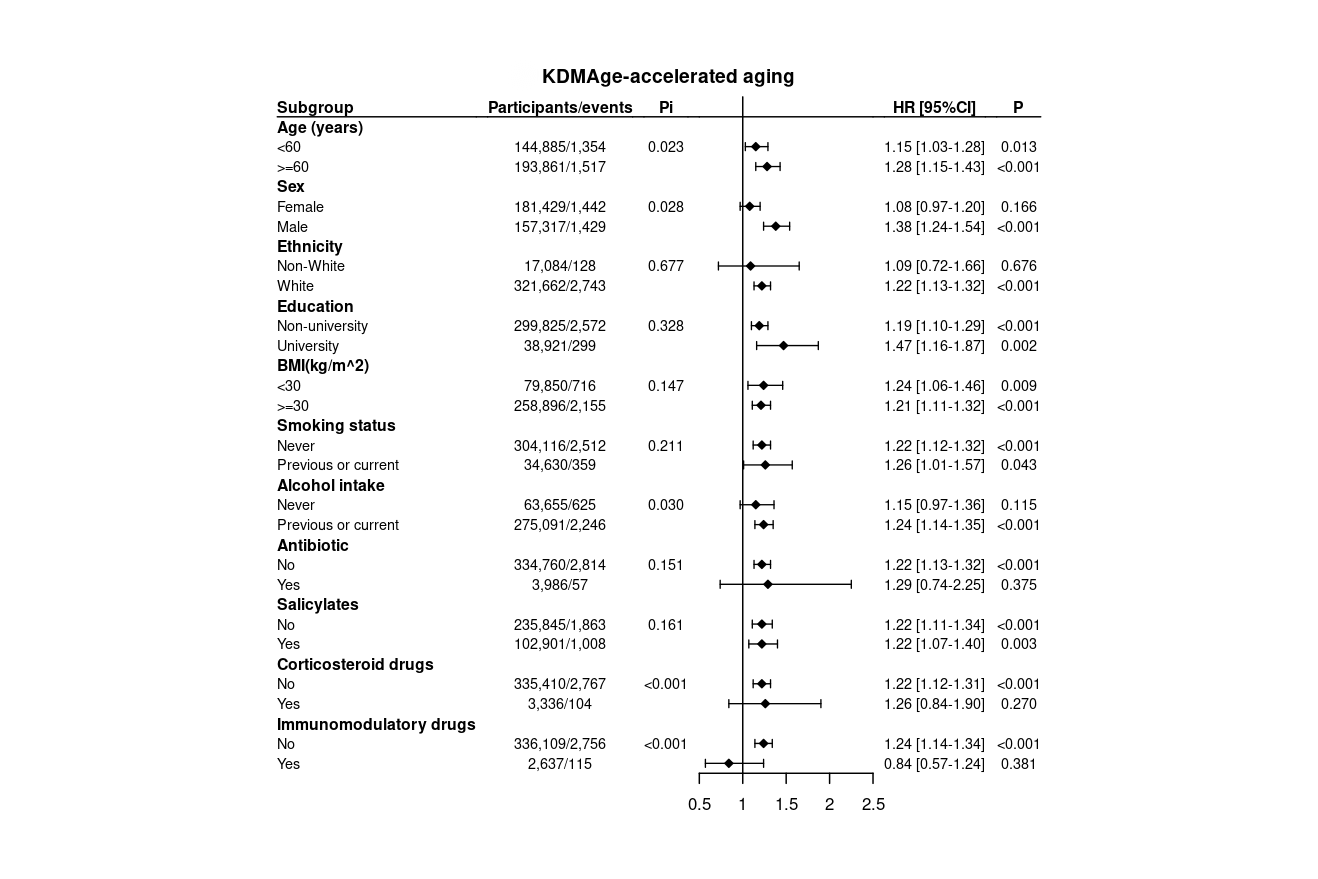


***Supplementary Figure 4: Forest plot of subgroup interaction effects on PhenoAgeAccel (IBD).***


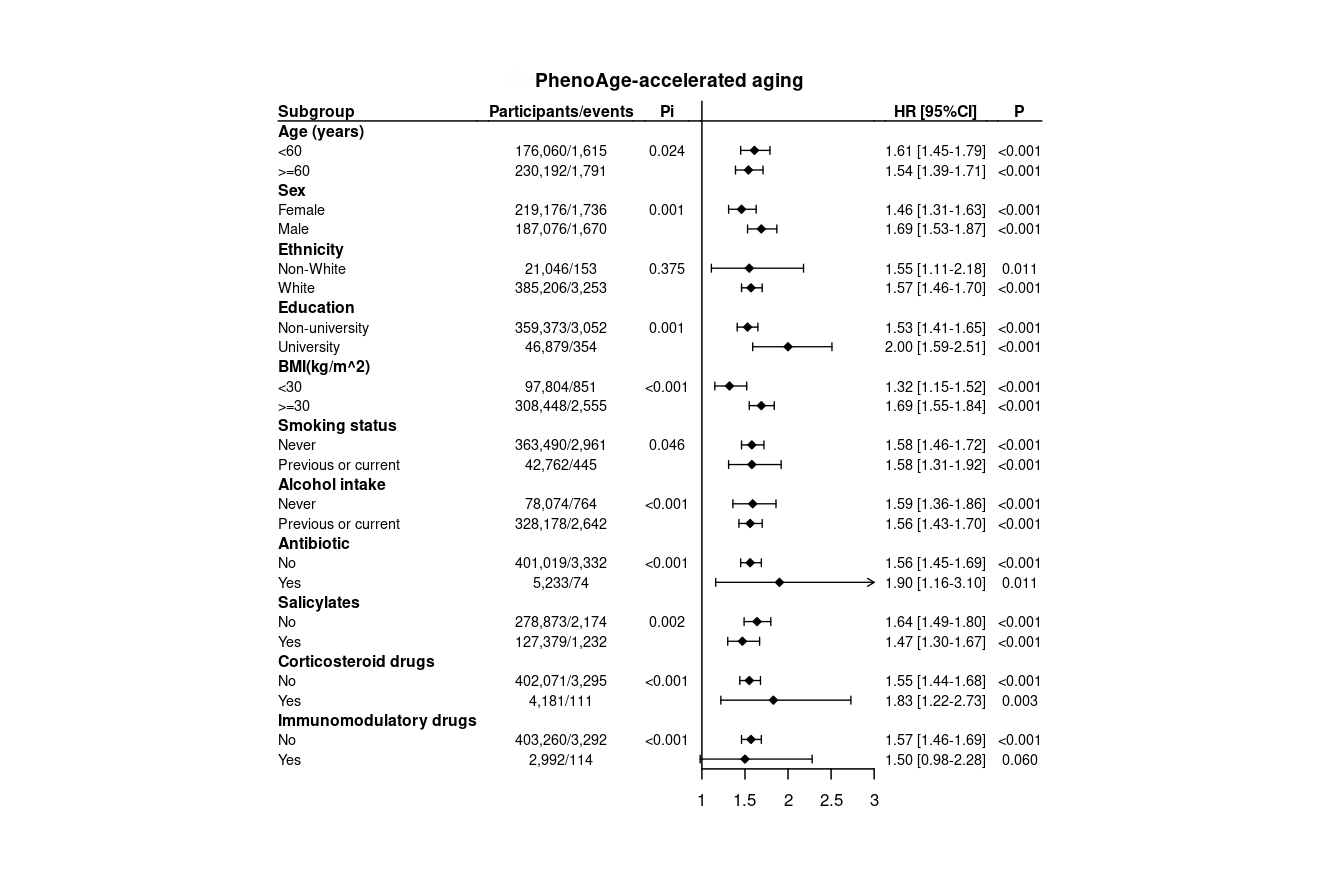


***Supplementary Figure 5:Forest plot of subgroup interaction effects on KDMAgeAccel (UC).***


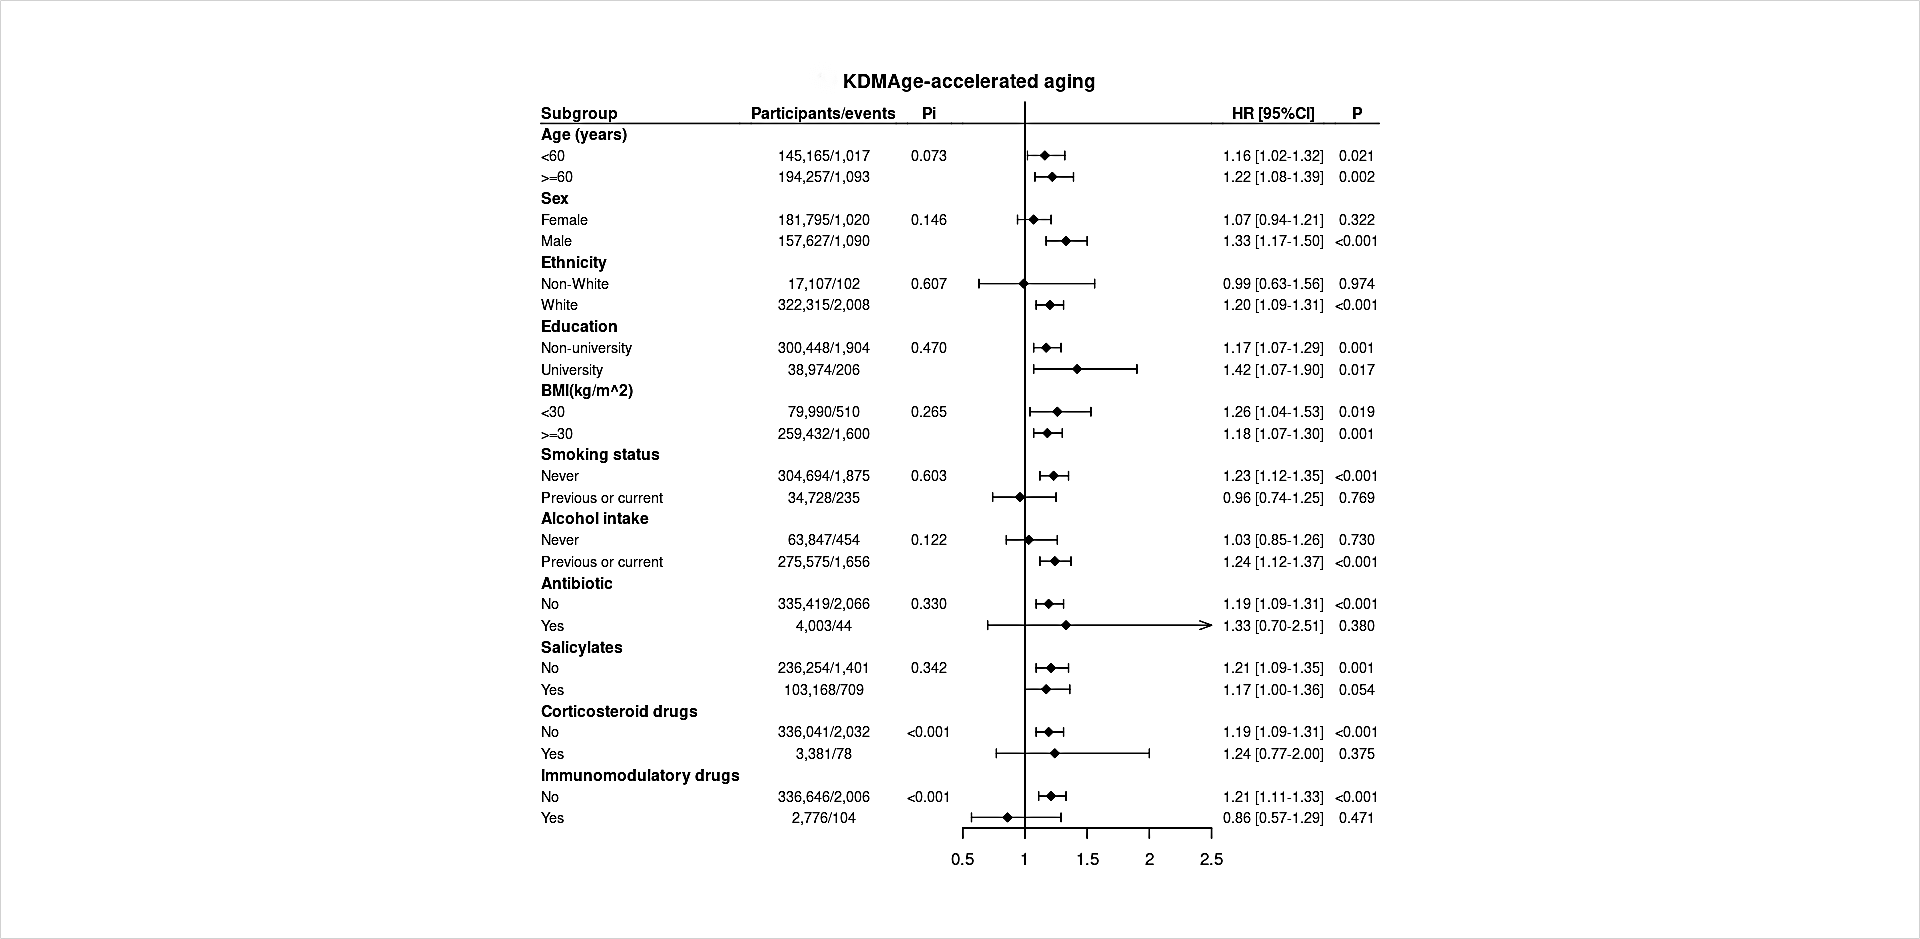


***Supplementary Figure 6: Forest plot of subgroup interaction effects on PhenoAgeAccel (UC)***.


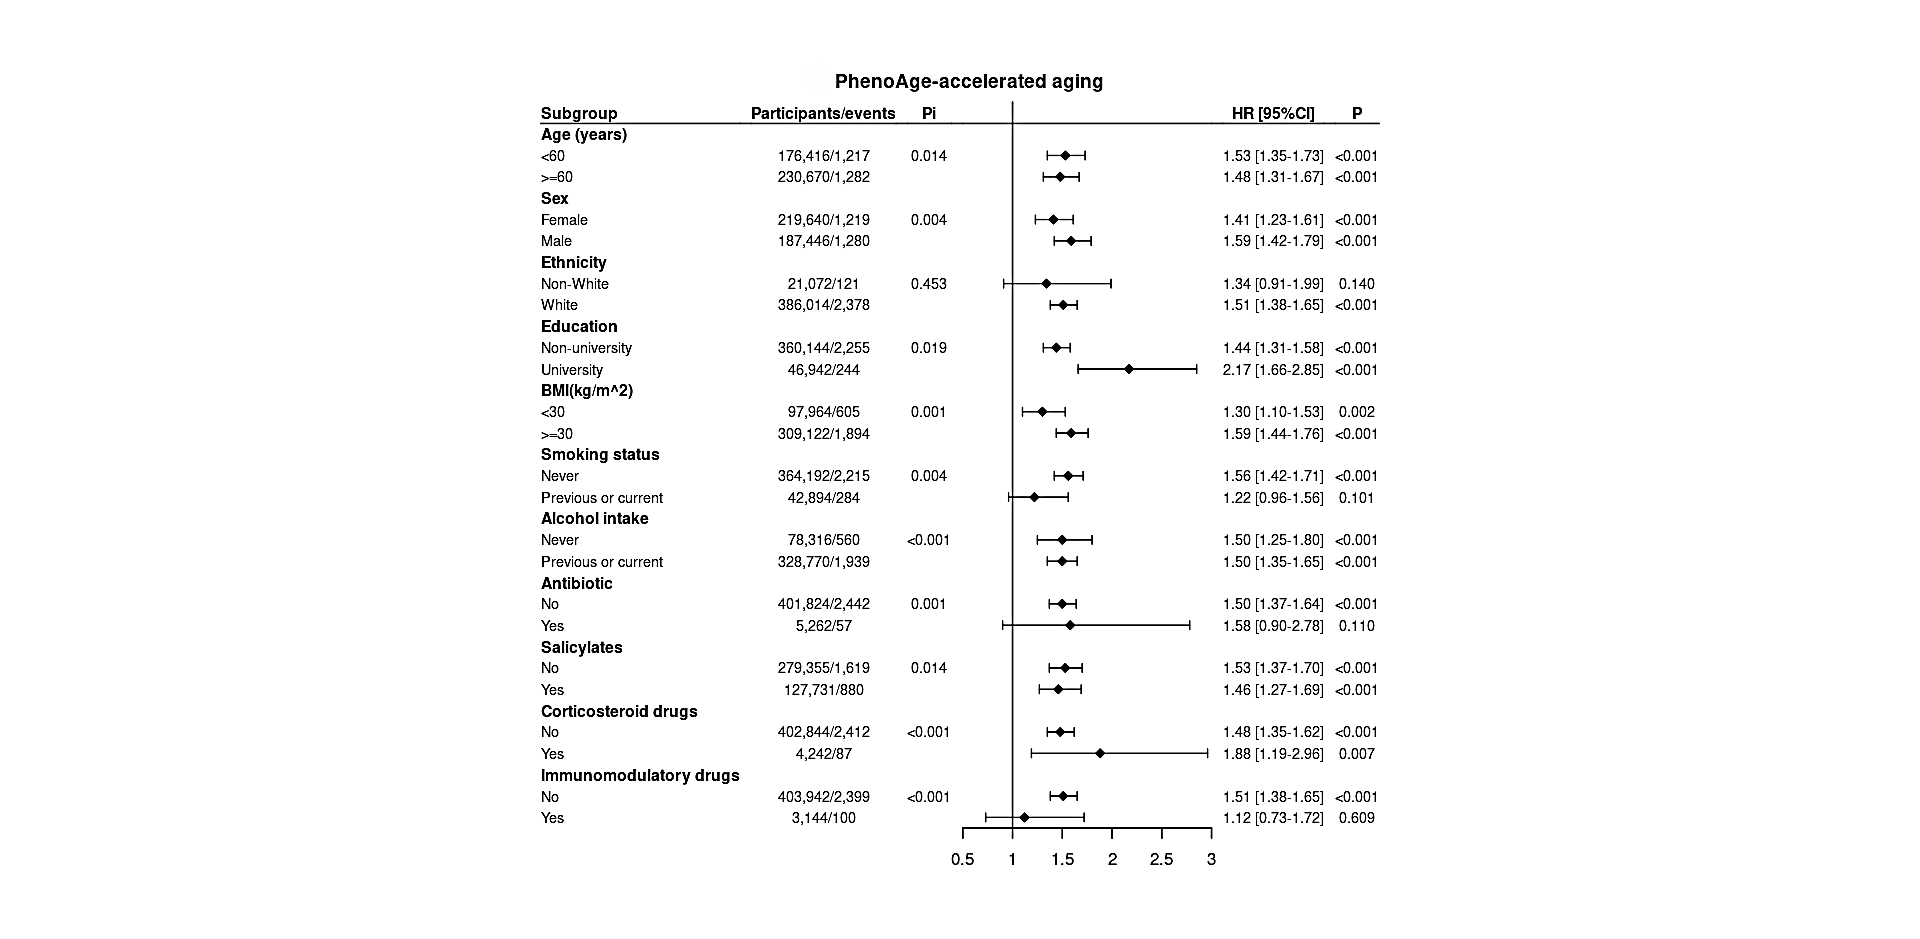


***Supplementary Figure 7: Forest plot of subgroup interaction effects on KDMAgeAccel (CD).***

***
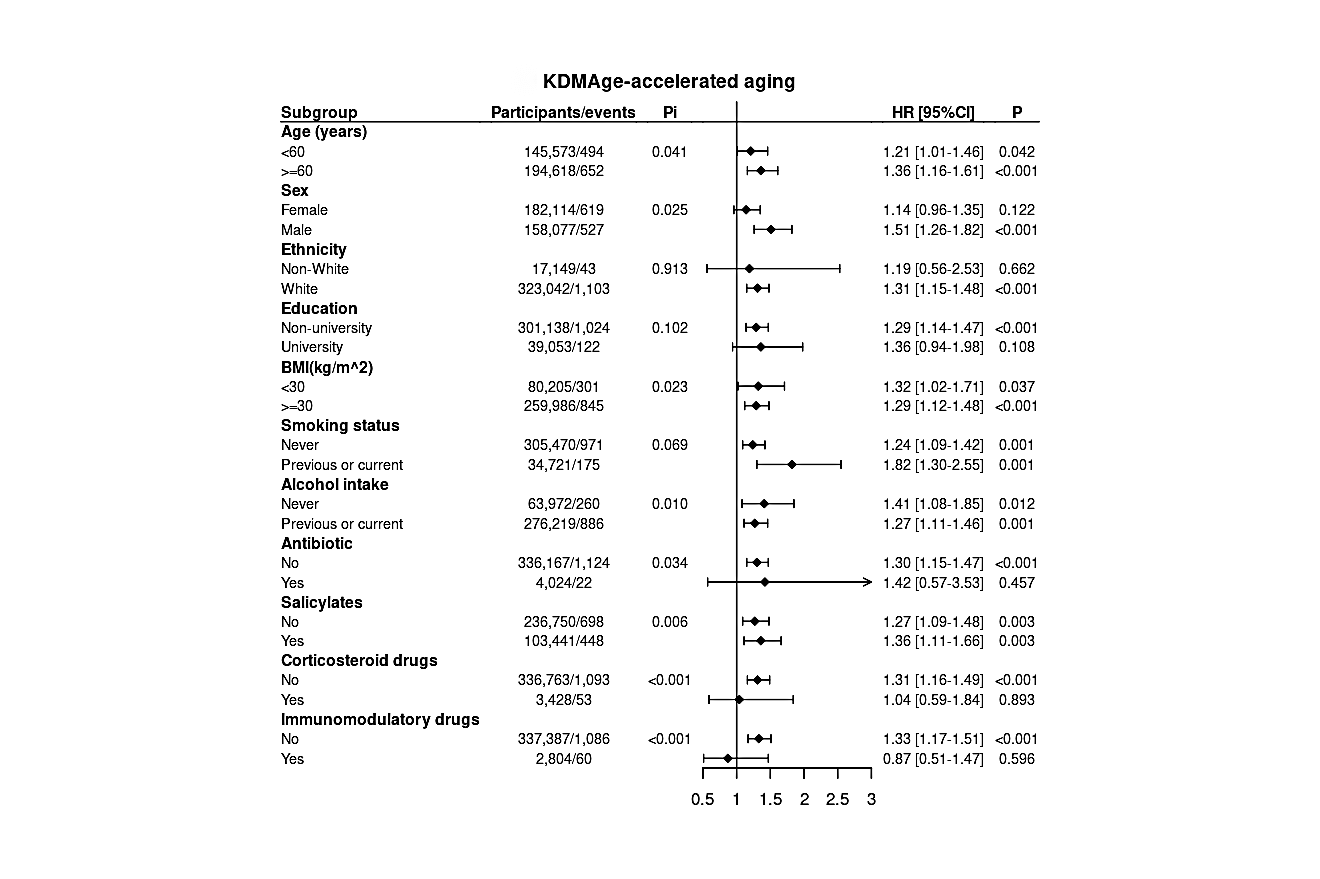
***

***Supplementary Figure 8: Forest plot of subgroup interaction effects on PhenoAgeAccel (CD).***


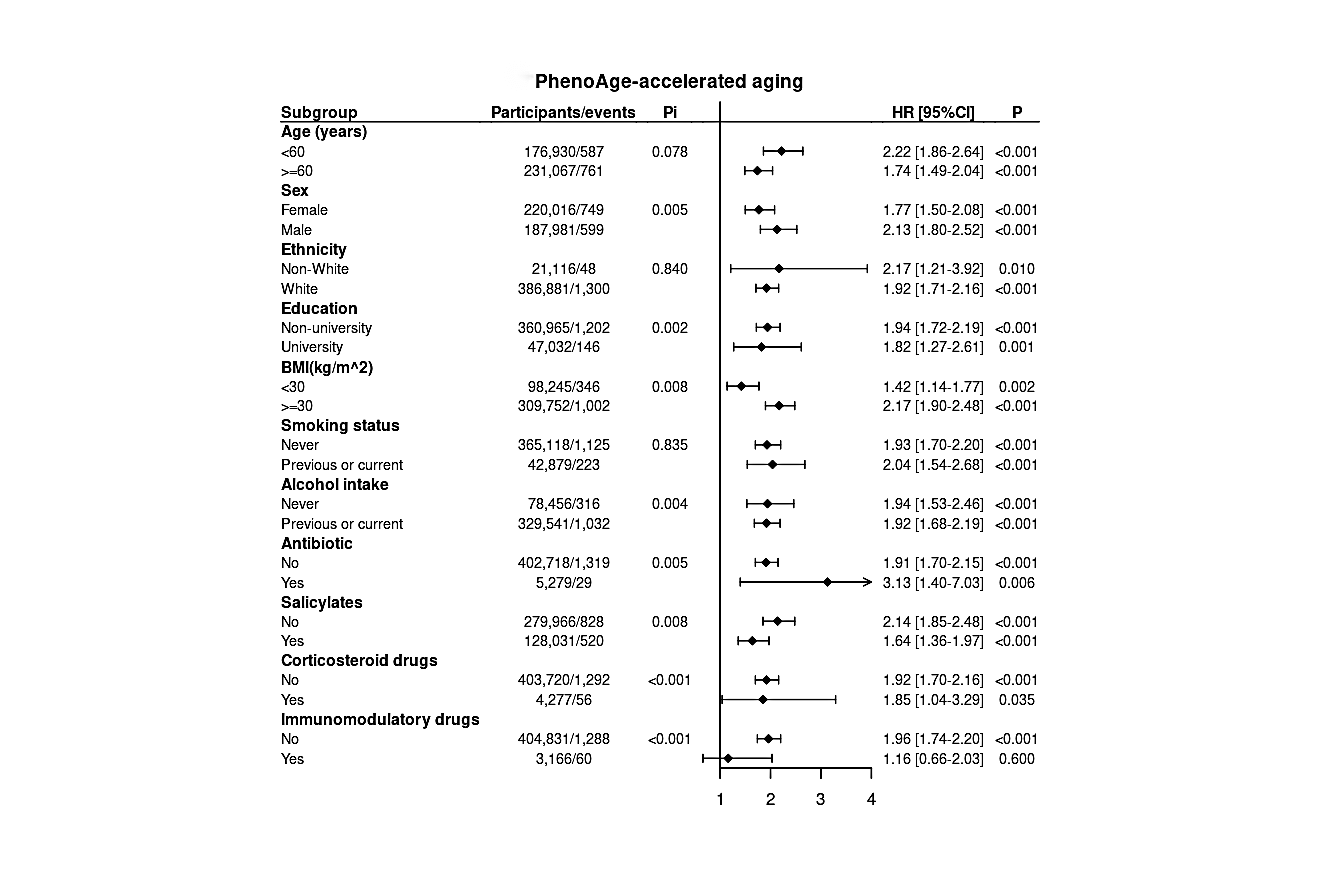


***Supplementary Figure 9: Dose-response association between KDMAgeAccel/PhenoAgeAccel and IBD risk as assessed by restricted cubic spline regression.***


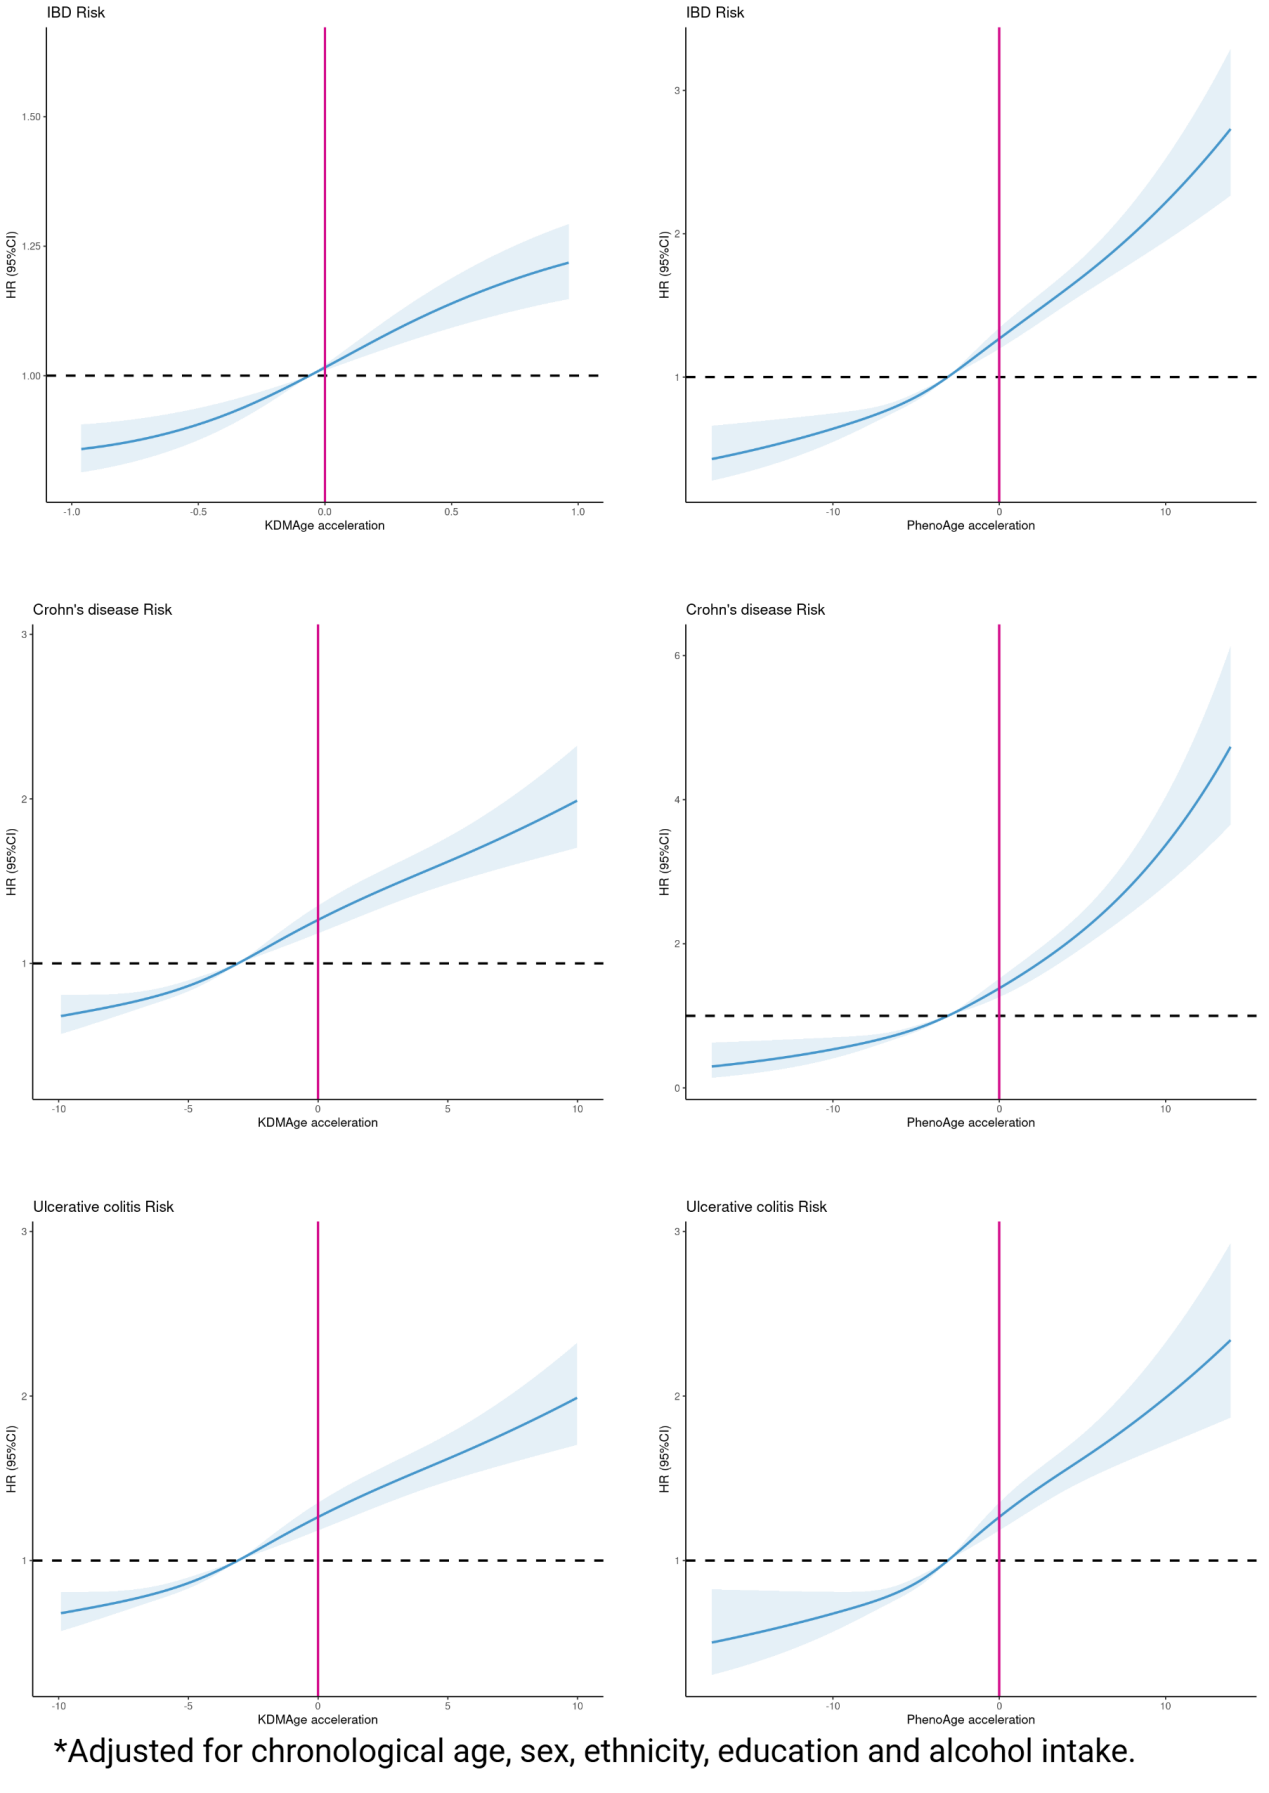

Supplement: Supplementary file 1 [file 57bae7559c3d1635c6f5889c.docx]
